# Supplementary material for: Impaired spontaneous belief inference following acquired damage to the left posterior temporoparietal junction
Source: PubMed Central journal article supplement (PMC5040917; doi:10.1093/scan/nsw076), 2016-06-17
Supplement: supp_nsw076_scan-16-213-File006.pdf [file supp_nsw076_scan-16-213-File006.pdf]

**Table supplement 1.** Neuropsychological profile of the patients IM and KV.

| Test                                                   | Patient IM  |           | Patient KV  |            |              |
|--------------------------------------------------------|-------------|-----------|-------------|------------|--------------|
|                                                        | 2011        | 2012-2013 | 2010        | 2012       | 2014         |
| <b><i>Working Memory</i></b>                           |             |           |             |            |              |
| <b><i>Storage</i></b>                                  |             |           |             |            |              |
| Arithmetic Span <sup>a</sup> (forwards)                | 7           | -         | <b>3</b>    | <u>4</u>   | <u>4</u>     |
| Spatial Span <sup>a</sup> (forwards) (NS) <sup>b</sup> | 9           | -         | <b>4</b>    | <b>2</b>   | <b>3</b>     |
| <b><i>Manipulation</i></b>                             |             |           |             |            |              |
| Arithmetic Span (backwards)                            | 5           | -         | 3           | <u>2</u>   | <u>2</u>     |
| Spatial Span (backwards) (NS) <sup>b</sup>             | 10          | -         | 7           | <b>4</b>   | 6            |
| <b><i>Long-term Memory</i></b>                         |             |           |             |            |              |
| <b><i>Visual</i></b>                                   |             |           |             |            |              |
| Doors Test <sup>c</sup> – Part A                       | 12/12       | -         | 11/12       | 11/12      | 9/12         |
| – Part B                                               | 11/12       | -         | 8/12        | 8/12       | 9/12         |
| – Total                                                | 23/24       | -         | 19/24       | 19/24      | 18/24        |
| <b><i>Verbal</i></b>                                   |             |           |             |            |              |
| Buschke 16 items <sup>d</sup>                          |             |           |             |            |              |
| Immediat recall                                        | 16/16       | 16/16     | 16/16       | -          | 16/16        |
| Recall 1 – Free                                        | <b>4/16</b> | 11/16     | <u>5/16</u> | -          | 7/16         |
| – Total                                                | 16/16       | 16/16     | <u>9/16</u> | -          | <b>11/16</b> |
| Recall 2 – Free                                        | <b>5/16</b> | 15/16     | <b>3/16</b> | -          | <b>5/16</b>  |
| – Total                                                | 15/16       | 16/16     | <b>8/16</b> | -          | <b>10/16</b> |
| Recall 3 – Free                                        | <b>5/16</b> | 14/16     | <b>4/16</b> | -          | <b>8/16</b>  |
| – Total                                                | 15/16       | 16/16     | <b>6/16</b> | -          | 15/16        |
| Recognition                                            | 16/16       | 16/16     | <b>6/16</b> | -          | <b>14/16</b> |
| Delayed free recall – Free                             | <b>8/16</b> | 15/16     | <b>1/16</b> | -          | <b>8/16</b>  |
| – Total                                                | 15/16       | 16/16     | <b>5/16</b> | -          | 15/16        |
| <b><i>Executive Functions</i></b>                      |             |           |             |            |              |
| Stroop Test <sup>e</sup>                               |             |           |             |            |              |
| Colors Naming – Time (s)                               | <b>76</b>   | 61        | 70          | <b>87</b>  | <b>96</b>    |
| – uncorrected Errors                                   | 0           | 0         | <u>1</u>    | <b>4</b>   | 0            |
| Words Reading – Time (s)                               | <b>53</b>   | 44        | 55          | 63         | <b>83</b>    |
| – uncorrected Errors                                   | 0           | 0         | 0           | <b>3</b>   | 0            |
| Inhibition – Time (s)                                  | <b>236</b>  | 101       | <b>175</b>  | <b>211</b> | 178          |
| – uncorrected Errors                                   | <b>5</b>    | 0         | 0           | 1          | <b>4</b>     |
| Inhibition-Naming – Time (s)                           | <b>160</b>  | 40        | <b>105</b>  | <b>124</b> | 82           |
| – uncorrected Errors                                   | <b>5</b>    | 0         | -1          | -3         | <b>4</b>     |
| Trail Making Test <sup>f</sup>                         |             |           |             |            |              |

|                                           |            |            |              |              |            |
|-------------------------------------------|------------|------------|--------------|--------------|------------|
| Part A – Time (s)                         | 22         | 23         | 73           | 60           | 77         |
| – Errors                                  | 0          | 0          | 0            | 0            | 0          |
| Part B – Time (s)                         | 69         | 78         | <b>343</b>   | <b>311</b>   | <u>225</u> |
| – Errors                                  | 0          | 0          | <b>4</b>     | 0            | 1          |
| Brixton Test <sup>g</sup>                 |            |            |              |              |            |
| Errors                                    | -          | -          | -            | -            | 5          |
| Fluency                                   |            |            |              |              |            |
| Category fluency (animals)                | 29         | -          | <b>16</b>    | <u>21</u>    | 28         |
| Letter fluency (P)                        | 15         | 18         | <u>13</u>    | 22           | 21         |
| <b>Attention</b>                          |            |            |              |              |            |
| D2 cancellation task <sup>h</sup>         |            |            |              |              |            |
| Speed                                     | <b>234</b> | <b>330</b> | -            | -            | 402        |
| Quality                                   | 0,8%       | 1,2%       | -            | -            | 10,44%     |
| Profitability                             | <b>232</b> | <u>326</u> | -            | -            | 360        |
| Regularity                                | 8          | 9          | -            | -            | 23         |
| <b>Logical Reasoning</b>                  |            |            |              |              |            |
| Progressives Matrices (PM38) <sup>i</sup> | 52/60      | -          | <u>29/60</u> | <b>26/60</b> | 36/60      |

The impaired performances (the cut-off score  $-2 SD$  or  $<P5$ , is based on published norms for each test) are **highlighted in bold**. The borderline performances (between  $-1.4 SD$  and  $1.9 SD$  or between P9 and P3) are underlined.

<sup>a</sup> Wechsler (1997).

<sup>b</sup> N.S = standard note

<sup>c</sup> Baddeley, Emslie & Nimmo-Smith (1994)

<sup>d</sup> Epreuve de Rappel Libre/Rappel Indicé à 16 items – Van der Linden et al. (2004)

<sup>e</sup> Stroop (1935).

<sup>f</sup> Reitan & Wolfson (1985)

<sup>g</sup> Burgess & Shallice (1997)

<sup>h</sup> Brickenkamp (1981)

<sup>i</sup> Raven, Raven & Court (1998)

**Table supplement 2.** Patients IM's and KV's performance (and mean of scores and standard deviation of their matched control subjects) across the four tasks and the different types of trials. We first compared the patients' number of correct responses for all trials in each of the four tasks to the number of correct responses of their matched control subjects by means of a modified t-test which allows comparing one person's performance to that of a group of controls (Crawford and Howell, 1998). When the variability in the controls' score was nil, the modified t-test could not be applied. In those cases, we considered the score of 10/12 as the limit for a spared performance for the following reasons. Firstly, one or two errors may be caused by distraction. Secondly, the score of 10/12 was statistically significantly different from chance level (one-tailed P-value associated with getting 10/12 correct = 0.019 by binomial test) and above the chance level cutoff of 9/12. **Impaired scores are in bold.**

|                     | Patient IM<br>(Mean of controls $\pm$ SD) | IM compared to<br>controls<br>(modified <i>t</i> -test,<br>one-tailed <i>p</i> ) | Patient KV<br>(Mean of controls $\pm$<br>SD) | KV compared to<br>controls<br>(modified <i>t</i> -test,<br>one-tailed <i>p</i> ) |
|---------------------|-------------------------------------------|----------------------------------------------------------------------------------|----------------------------------------------|----------------------------------------------------------------------------------|
| <b>Task 1</b>       |                                           |                                                                                  |                                              |                                                                                  |
| FB (n=12)           | <b>0</b><br>(10.8 $\pm$ 1.10)             | <b>t(4) = -8.963,</b><br><b>p = 0.000</b>                                        | <b>0</b><br>(9.6 $\pm$ 2.30)                 | <b>t(4)= -3.810,</b><br><b>p = 0.009</b>                                         |
| TB (n=12)           | 12<br>(12 $\pm$ 0.00)                     | n/a                                                                              | 12<br>(11.6 $\pm$ 0.89)                      | t(4)= 0.410,<br>p = 0.351                                                        |
| MC (n=12)           | 12<br>(11.6 $\pm$ 0.55)                   | t(4) = 0.664,<br>p = 0.271                                                       | 11<br>(12 $\pm$ 0.00)                        | n/a                                                                              |
| IC (n=6)            | 6<br>(6 $\pm$ 0.00)                       | n/a                                                                              | 6<br>(6 $\pm$ 0.00)                          | n/a                                                                              |
| Fillers (n=6)       | 6<br>(6 $\pm$ 0.00)                       | n/a                                                                              | 6<br>(6 $\pm$ 0.00)                          | n/a                                                                              |
| <b>Task 2</b>       |                                           |                                                                                  |                                              |                                                                                  |
| FB (n=12)           | 11<br>(11.8 $\pm$ 0.45)                   | t(4) = -1.623 ,<br>p = 0.089                                                     | 12<br>(12 $\pm$ 0.00)                        | n/a                                                                              |
| TB (n=12)           | 12<br>(11.6 $\pm$ 0.89)                   | t(4)= 0.410,<br>p = 0.351                                                        | 10<br>(12 $\pm$ 0.00)                        | n/a                                                                              |
| MC + fillers (n=12) | 12<br>(12 $\pm$ 0.00)                     | n/a                                                                              | 11<br>(12 $\pm$ 0.00)                        | n/a                                                                              |
| <b>Task 3</b>       |                                           |                                                                                  |                                              |                                                                                  |
| FB (n=12)           | <b>8</b><br>(11.2 $\pm$ 1.30)             | <b>t(4) = -2.247,</b><br><b>p = 0.044</b>                                        | <b>2</b><br>(12 $\pm$ 0.00)                  | n/a                                                                              |
| TB (n=12)           | 12<br>(12 $\pm$ 0.00)                     | n/a                                                                              | 11<br>(11.8 $\pm$ 0.45)                      | t(4) = -1.623 ,<br>p = 0.089                                                     |
| <b>Task 4</b>       |                                           |                                                                                  |                                              |                                                                                  |
| FB (n=12)           | 12<br>(11.8 $\pm$ 0.45)                   | t(4)= 0.406,<br>p = 0.352                                                        | 12<br>(12 $\pm$ 0.00)                        | n/a                                                                              |
| TB (n=12)           | 12<br>(12 $\pm$ 0.00)                     | n/a                                                                              | 11<br>(12 $\pm$ 0.00)                        | n/a                                                                              |

FB = False belief; TB = True belief; MC = Memory control; IC = Inhibition control; n/a = not-applicable.

**Table supplement 3.** In a single case design, a classical dissociation is established (1) when the patient has a deficit on Task X and is within normal limits on Task Y, and (2) when there is a significant difference between performances on Task X and Y (Crawford, Garthwaite, & Gray, 2003). Thus, in an additional set of analyses, we compared the patients' performance on the false belief trials across tasks 1 and 2 on the one hand and, across tasks 3 and 4 on the other hand by means of the Revised Standardized Difference Test (Crawford and Garthwaite, 2005).

|            | Comparison between task 1<br>and task 2                                                                                                             | Comparison between task 3<br>and task 4                                                                                                              |
|------------|-----------------------------------------------------------------------------------------------------------------------------------------------------|------------------------------------------------------------------------------------------------------------------------------------------------------|
| Patient IM | $t(4) = 4,981, p_{\text{two-tailed}} = 0,007$                                                                                                       | $t(4) = 4,522, p_{\text{two-tailed}} = 0,0106$                                                                                                       |
|            | n/a                                                                                                                                                 | n/a                                                                                                                                                  |
| Patient KV | but the difference between the two tasks was very large (0/12 and 12/12) and the patient's performance in task 1 was below the chance level cutoff. | but the difference between the two tasks was quite large (8/12 and 12/12) and the patient's performance in task 3 was below the chance level cutoff. |
